# Supplementary material for: The long-term outcomes of deceased-donor liver transplantation for primary biliary cirrhosis: a two-center study in China
Source: PeerJ. 2020 Aug 19;8:e9563. doi: 10.7717/peerj.9563 (PMC7443077; doi:10.7717/peerj.9563)
Supplement: Supplemental Information 1 [file peerj-08-9563-s001.xls]

## Sheet: Sheet1
					BLOOD TEST(Preoperatively)																				Postoperative (Day)
AGE	GENDER	date for LT	follow-up period（m）	cause of death	WBC	RBC	PLT	PT	PTA	INR	BUN	CRE	APRI	AST-0(UI/L)	ALT-0(IU/L)	ALP-0(IU/L)	GGT-0(IU/L)	TBIL-0（umol/L）	TBIL-0(mg/dl)	DBIL-0(umol/L)	DBIL-0(mg/dl)	TBA-0	ALB-0(g/L)	CHE-0	AST-1	ALT-1	ALP-1	GGT-1	TBIL-1(umol/L)	DBIL-1(umol/L)	TBIL-1（mg/dl）	DBIL-1（mg/dl）	TBA-1	ALB-1	CHE-1	AST-2	ALT-2	ALP-2	GGT-2	TBIL-2(umol/L)	DBIL-2(umol/L)	TBIL-2（mg/dl）	DBIL-2（mg/dl）	TBA-2	ALB-2	CHE-2	AST-3	ALT-3	ALP-3
45	1	2014-03-14	17		1.95	2.26	77	24.1	35	2.04	7.77	55.6	0.607792	46.8	34.9	132.1	16.2	702.21	41.0649	323.18	18.8994	330	30		860.7	413.7	76.1	18.5	440.52	228	25.7614	13.3333	152	32	2159	104.7	186.6			221.75	113	12.9678	6.60819		36		33.1	82.7
50	1	2008-05-30	87		3.5	2.19	55	14.8			3.88	41	0.981818	54	29	175	123	372	21.7544	208	12.1637		30		1043	991	62	39	185	106	10.8187	6.19883	21	38		527	815	83	32	108	47	6.31579	2.74854		28		188	448	86
55	1	2011-03-16	52		1.95	2.81	34	14.6	74	1.22		78.6	0.941176	32	19	182	68	47	2.74854	25	1.46199		34		479	301	54	22	55	18	3.21637	1.05263		36		170	177	47	21	42	18	2.45614	1.05263		35	4886	60	131	42
60	1	2013-09-25	24		6.51	2.34	155	25	34	2.09	3.5	36.7	3.30968	513	201	113	61	558	32.6316	298	17.4269	261	28		4132	898	70	33	388	206	22.6901	12.0468	231	35		2250	724	82	61	445	143	26.0234	8.36257		37	4005	886	476	87
46	1	2010-04-17	65		2.84	3.38	79	12.8	105	0.97	6.09	39.7	0.582278	46	53	191	149	7	0.409357	2	0.116959	38	31		666	439	70	53	23	5	1.34503	0.292398		41	5329	45	160	62	37	14	3	0.818713	0.175439		40		25	115	66
56	1	2012-02-23	42		1.53	2.5	76	23	36	2.16	4.1	40.5	1.39474	106	34	155	62	309	18.0702	127	7.4269		41								0	0										0	0
46	1	2007-01-10	104																0		0										0	0										0	0
56	1	2013-01-17	31		2.57	2.82	46	13.2	68	1.23	8.3	60	1.30435	60	33	136	94	73	4.26901	36	2.10526		29	4422	944	1188	76	73	52	22	3.04094	1.28655		41		394	1056	83	110	77	38	4.50292	2.22222		36		116	684	95
51	1	2007-12-28	92						38										0		0										0	0										0	0
51	1	2014-11-10	9		1.6	3.2	37	13.4	70	1.17	4.89	50	0.702703	26	32	74	31	21	1.22807	4	0.233918		40		576	434	64	29	28	8	1.63743	0.467836	17	37	4484	136	231	53	52	21	6	1.22807	0.350877		38		58	183	51
65	1	2014-07-08	0.5	abdominal hemorrhage(2014-7-23)	3.05	2.95	68	12.6	71	1.1	8.11	94.1	0.382353	26	19	108	41	8	0.467836	2	0.116959		34								0	0										0	0
65	1	2009-02-12	78		3.3	2.89	61	17.2			3.88	50.1	0.688525	42	24	163	81	124	7.25146	78	4.5614	36	26		1543	1162	59	62	94	56	5.49708	3.27485		38		390	560	49	69	101	49	5.90643	2.8655		28	2456	169	375	59
63	1	2010-11-08	57		7.86	2.53	144	19.1	49	1.66	6.8	60.4	0.895833	129	70	229	80	216	12.6316	86	5.02924	323	28		2485	973	83	51	118	57	6.90058	3.33333		36		834	807	93	89	122	46	7.1345	2.69006		42		267	543	71
42	1	2014-05-01	15		7.6	2.3	97	50.1	13	4.07			0.164948	16	8	445	538	203	11.8713	117	6.84211		30								0	0										0	0
61	1	2015-05-15	3		3.28	3.17	63	19.3	34	1.7	8.83	71.2	3.63492	229	111	287	56	258	15.0877	137	8.0117		30		657	554	133	36	213	127	12.4561	7.4269	198	28		296	378	85	60	113	47	6.60819	2.74854	3	36	4068	93	234	68
64	1	2013-05-01	25																0		0										0	0										0	0
63	1	2015-01-30	7		1.24	3.57	66	11.9	77	1.05	2.79	39.4	0.439394	29	17	151	115	28	1.63743	10	0.584795		32		568	183	150	92	46	14	2.69006	0.818713	33	35	4134	67	95	133	70	41	14	2.39766	0.818713		41		24	61	130
49	1	2009-12-15	68		2.31	1.94	32	16.9	62	1.39	7.85	62.1	6.6875	214	114	310	188	698	40.8187	316	18.4795		24		581	267	87	48	235	75	13.7427	4.38596	48	34		104	159	90	42	120	51	7.01754	2.98246	4	31		74	150	96
46	1	2006-03-21	107																0		0										0	0										0	0
52	1	2010-11-02	57		3.89	2.49	23	16.7	63	1.36	8.07	87.5	5	115	30			483	28.2456	268	15.6725		32		2238	672	56	45	168	53	9.82456	3.09942		40	4621	330	271	43	21	103	42	6.02339	2.45614		29	3187	66	183	47
53	1	2012-06-15	39		1.38	2.9	74	22.3	40	2	4.21	54.3	0.945946	70	49	137	65	62	3.62573	24	1.40351		28		1373	1355	173	134	269	157	15.731	9.18129		25	4490	2008	1351	185	168	241	142	14.0936	8.30409		28	4551	1688	1220	171
56	1	2011-04-13	52		4.19	2.93	161	14.1	81	1.15	12.15	84.8	0.745342	120	47	252	218	16	0.935673	6	0.350877		25		307	199	189	188	37	10	2.16374	0.584795		39		105	131	160	123	17	7	0.994152	0.409357		36	6936	53	107	165
60	1	2010-09-10	60		3.54	2.36	111	13.1	99	1.01	17.06	121.6	0.900901	100	43	459	170	127	7.4269	53	3.09942		27		342	364	64	32	55	25	3.21637	1.46199		28		542	663	79	24	110	61	6.43275	3.56725		32	2436	280	485	92
63	1	2011-08-31	48		4.65	2.57	125	22.4	40	1.95	4.18	38.8	0.264	33	27	59	16	50	2.92398	5	0.292398		37		1407	402	68	50	68	10	3.97661	0.584795		36		266	237	49	65	169	58	9.88304	3.39181		37	3764	121	166	48
50	1	2012-09-13	36		2.37	2.72	32	16.8	48	1.51	2.89	51	1.21875	39	20	77	44	29	1.69591	10	0.584795		23	2082	6051	1509	4	69	80	14	4.67836	0.818713	53	40		928	883	41	5	41	12	2.39766	0.701754		35	3231	223	615	41
51	1	2013-11-28	21		13.69	3.99	103	32.6	26	2.67	10.03	87.8	1.03883	107	86	146	204	332	19.4152	110	6.43275		33		1195	1237	69	204	259	115	15.1462	6.72515		34		186	559	66	210	124	57	7.25146	3.33333		36		61	334	60
50	1	2014-01-16	20		5.61	2.7	58	20.2	43	1.72	16.1	150.1	1.84483	107	61	205	67	665	38.8889	281	16.4327		28		1068	714	72	55	263	147	15.3801	8.59649	159	32		366	441	53	89	448	182	26.1988	10.6433		41	4797	125	279	57
50	1	2014-06-27	14		1.34	2.59	83	13.1	67	1.15	3.17	56.5	1.19277	99	52	608	307	14	0.818713	5	0.292398	35	39		380	182	164	84	80	19	4.67836	1.11111	18	52		141	171	163	105	72	26	4.21053	1.52047	5	46	3647	42	127	147
46	1	2010-07-01	14	infection（2011-9-10）	3.32	3.17	52	20	47	1.73	5.35	59.9	4.03846	210	124	181	46	71	4.15205	24	1.40351		30								0	0										0	0
46	1	2009-06-23	74		8.5	2.77	123	20.1	49	1.69	7.36	51.2	0.373984	46	103	69	57	345	20.1754	226	13.2164		28		471	394	44	33	175	87	10.2339	5.08772		43		144	332	81	49	176	76	10.2924	4.44444		38	2768	69	220	61
50	1	2011-04-08	52		5.26	1.83	2	28.6	27	2.89	12.39	43	12.6	25.2	18.4	113.8	55.3	234.65	13.7222	124.11	7.25789	97	29.2								0	0				46.9	170.3	49.2	47.1	43.65	17.46	2.55263	1.02105		34.9	3779	20.9	101.1	62.3
43	1	2010-07-22	62		4.82	3.43	64	19.1	49	1.66	3.37	46.3	1.85938	119	80	146	57	361	21.1111	183	10.7018		34		1747	919	78	153	204	105	11.9298	6.14035	153	34		239	618	77	156	102	49	5.96491	2.8655		38		70	411	74
66	1	2010-04-16	64		4.87	2.78	65	21.2	43	1.87	3.47	73.9	0.846154	55	27	92	27	470	27.4854	250	14.6199	142	23		795	493	63	30	241	88	14.0936	5.1462	11	38	4079	194	328	53	20	127	63	7.4269	3.68421	6	31		69	236	56
59	1	2011-09-23	47		4.57	2.91	96	14.3	86	1.1	4.75	56.9	1.01042	97	55	352	215	204	11.9298	106	6.19883		29		516	367	166	161	182	77	10.6433	4.50292	21	39	4712	120	256	159	143	111	44	6.49123	2.5731	11	36		51	144	155
55	1	2008-12-31	80		5.7	2.91	110	15.6	17		3.71	49.5	1.13636	125	59	226	147	335	19.5906	242	14.152		33		408	279	100	56	165	84	9.64912	4.91228	35	33		147	219	92	65	135	90	7.89474	5.26316		35		55	151	90
58	1	2012-06-27	38		8.33	2.18	135	15.4	72	1.4	1.85	64.1	0.681481	92	50	386	91	408	23.8596	214	12.5146		24		1058	727	174	67	267	105	15.614	6.14035	107	35		152	413	139	48	169	79	9.88304	4.61988	10	34	4158	58	269	117
59	1	2014-10-20	10		1.92	2.54	45	11.3	81	1	4.68	70	0.422222	19	10	168	20	7	0.409357	2	0.116959	28	36								0	0										0	0
55	1	2012-11-02	33		2.55	2.42	81	13.2	65	1.24	5.43	52.1	1.88889	153	61	732	306	575	33.6257	262	15.3216	333	29		1314	1180	303	144	282	99	16.4912	5.78947	53	35	3730	267	580	241	103	126	51	7.36842	2.98246	11	36	2940	85	362	214
53	1	2012-10-29	31		5.43	2.33	188	14.5	58	1.3	3.05	44.7	0.712766	134	41	461	155	553	32.3392	258	15.0877		27		386	353	223	110	445	218	26.0234	12.7485	123	35	3966	206	305	207	94	293	141	17.1345	8.24561		36	3281	108	257	199
52	1	2014-09-03	11		3.53	3.07	51	20.3	37	1.76	11.49	107	2.43137	124	89	388	315	643	37.6023	304	17.7778	108	35		2446	570	100	64	155	89	9.06433	5.20468		38	4661	310	329	71	47	82	38	4.79532	2.22222		35	3613	72	202	72
46	1	2009-12-03	68		1.57	3.18	47	16.2	67	1.33	15.58	89.7	1.23404	58	19	105	40	412	24.0936	206	12.0468		32		606	248	71	59	256	85	14.9708	4.97076		48		157	179	70	48	138	46	8.07018	2.69006	2	44		42	94	59
42	1	2012-11-30	33		4.09	2.9	166	10.8	94	1.05	2.77	46.9	0.63253	105	56	498	779	107	6.25731	55	3.21637		32		1223	1366	254	507	83	42	4.8538	2.45614	5	30		255	867	229	412	43	18	2.51462	1.05263		30	3657	69	442	175
39	1	2010-08-16	60		2.31	3.42	97	13.5	93		3.15	60.6	0.865979	84	47	411	310	114	6.66667	53	3.09942		34		1778	344	224	159	76	44	4.44444	2.5731		43	4469	2570	1197	252	201	106	58	6.19883	3.39181		38		655	689	205
61	1	2013-06-09	26		12.44	3.04	500	12.1	70	1.15	4.93	68.1	0.042	21	6	107	59	7	0.409357	2	0.116959		28		933	544	78	49	30	9	1.75439	0.526316	1	34		125	253	72	40	21	9	1.22807	0.526316		33	4578	38	118	45
60	2	2011-01-22	14	liver failure（2012-3-28）	4.77	2.78	27	16.4	60	1.42	15.71	112	16.8889	456	229	54	29	80	4.67836	26	1.52047		39		114	136	59	23	31	11	1.81287	0.643275		30		100	105	67	21	30	12	1.75439	0.701754	1	35		300	296	64
44	2	2009-12-21	68		32.17	3.23	270	33.5	26	3.18	7.96	38.6	0.67037	181	161	278	344	169	9.88304	181	10.5848	165	27	2140	1614	550	56	136	165	85	9.64912	4.97076		33		176	373	56	110	120	62	7.01754	3.62573	11	34		70	273	74
62	2	2013-10-24	22		1.97	1.85	57	13.1	73	1.14	6.04	72.2	0.403509	23	8	215	93	44	2.5731	20	1.16959		31		616	300	117	77	63	24	3.68421	1.40351	72	33	3890	488	284	125	105	118	43	6.90058	2.51462		36		88	179	97
52	1	2011-08-07	48		4.25	2.88	116	14.1	87	1.1	4.73	67.8	1.0431	121	86	312	419	355	20.7602	172	10.0585		28		213	260	53	47	146	34	8.53801	1.9883		38	3651	134	218	46	21	103	18	6.02339	1.05263		36	4251	54	183	51
62	1	2011-05-17	51		1.41	3.68	40	14.3	79	1.17	8.9	96.8	0.375	15	13	81	61	22	1.28655	4	0.233918		44		2289	1013	40	91	52	22	3.04094	1.28655	20	45	7213	455	762	40	112	87	25	5.08772	1.46199		36	4279	186	610	44
60	1	2012-02-29	42		1.58	2.89	78	13.4	97	1.02	8.46	75.6	0.525641	41	48	201	137	14	0.818713	4	0.233918	53	36		3115	1857	98	103	46	19	2.69006	1.11111		29		936	1023	82	104	60	33	3.50877	1.92982	78	32		240	623	92
49	2	2012-12-12	32		3.01	3.91	33	14.5	60	1.32	11.34	89.4	0.878788	29	11	68	27	40	2.33918	14	0.818713	195	27	4465	875	395	37	24	126	44	7.36842	2.5731	103	40	3212	196	243	38	19	92	25	5.38012	1.46199	17	38	3599	73	165	53
62	2	2012-01-18	43		2.85	3.33	77	23.8	36	2.18	5.1	50.9	0.441558	34	21	160	22	76	4.44444	21	1.22807	276	28	2339	2745	2869	85	38	43	17	2.51462	0.994152		31		1506	2869	85	38	43	17	2.51462	0.994152		31		469	1087	61
55	2	2013-04-10	28		2.58	2.99	93	18	44	1.58	4.2	71.8	0.784946	73	40	236	301	30	1.75439	11	0.643275	32	34		245	193	159	212	48	12	2.80702	0.701754		40		138	182	112	166	26	5	1.52047	0.292398		35		74	135	98
59	2	2014-03-22	17		2.32	3.04	62	16.5	55	1.42	7.73	71.5	1.8871	117	69	453	402	224	13.0994	137	8.0117	177	29		1070	253	225	186	123	73	7.19298	4.26901	69	29		1807	288	204	181	130	79	7.60234	4.61988	15	31	4490	231	140
65	2	2014-01-17	19		3.74	3.91	43	11.3	88	0.99	10.28	90.5	1.04651	45	45	200	242	36	2.10526	14	0.818713		33								0	0										0	0
48	1	2015-02-07	44		8.41	3.08	160	13.3	74	1.15	11.05	70.8	0.935	149.6	77.5	328.7	154.1	623	36.4327	360.7	21.0936	291.4	33.8	2778	750	583	66.6	107	113	93	6.60819	5.4386	30.1	29.1	1820	130	276	46	59	48	24	2.80702	1.40351	2.8	30	1725	108	255	59
55	1	2015-07-16	39		3.52	3.78	114	13	77	1.19	8.9	74	0.5	57	19	129	118	60	3.50877	25	1.46199	55	30	1251	981	248	30	35	93	55	5.4386	3.21637	79	29	3476	137	152	156	79	77	50	4.50292	2.92398	80	26	2068	31	78	390
55	1	2016-10-27	24		8.62	2.16	157	11.7	94	1	15.07	59.3	0.658599	103.4	72.3	311	108	681.1	39.8304	463.3	27.0936	2	36.6	2723	1008.7	487.9	102.6	83.9	481.6	342.1	28.1637	20.0058	137.6	45.9	2731	438	345	91	55.8	427.8	282	25.0175	16.4912	102.1	41.3	2732	105.5	251.3	130.8
42	1	2017-02-23	20		5.18	3.21	154	16	63	1.35	2.2	44.6	1.12208	172.8	131	482.4	124.9	206	12.0468	64	3.74269	97.8	27.9	3106	870.1	423.5	215.6	57.3	266.3	127.3	15.5731	7.44444	49.3	35.7	1690	201.1	393.4	263.9	96.6	319.9	151.5	18.7076	8.85965	22.1	36.7	2239	114.1	280.3	227.1
57	1	2017-07-24	15		3.21	3.85	71	11	112	0.94	18.4	92.4	0.774648	55	44	194.4	78.3	46.8	2.73684	23.1	1.35088	64.2	40	2689	511	303	57.4	27	85.5	42.4	5	2.47953	18	46.2	3596	129.1	231.2	58.9	45.4	27.7	18.1	1.61988	1.05848	5.3	38	2640	59.5	160.9	104.1
53	1	2017-08-07	15		18.3	2.25	818	17.8	50	1.51	4.75	29	0.0676039	55.3	20.7	107.5	77.3	279.8	16.3626	157.4	9.20468	155.1	30.9	3084	1715.6	719	56.3	44.3	172.5	114.1	10.0877	6.67251	73.5	33.9	4142	1419.5	561.5	55.7	44.8	193.4	130.1	11.3099	7.60819	91.7	33.6	3719	261.7	286.3	67.3
53	1	2017-09-01	14		3.64	4.1	111	11.7	100	1	2.98	46.8	0.967568	107.4	64.9	276.2	303.8	31.1	1.81871	18.4	1.07602	75.5	37.8	7944	4585	1988	119	89.4	62.2	31.1	3.63743	1.81871	32.7	44.4	5082	4604	274.6	95.4	127.1	58.4	44.7	3.4152	2.61404	30.3	39.3	2746	1046.3	1632	125.1
47	1	2018-02-04	9		5.69	2.48	63	20.3	43	1.74	3.59	43.9	2.81587	177.4	83	103.5	39.8	374.7	21.9123	218.5	12.7778	179.9	26.1	1645	1575.6	858	66.5	67.4	251.4	167	14.7018	9.76608	89.4	36.2	3254	469.3	639.9	64.7	62.4	148.5	102	8.68421	5.96491	20.5	32.6	2476	176.4	475.1	69
54	1	2018-03-02	8		7.54	2.2	194	14.3	69	1.22	7.12	3.23	0.386598	75	52	358	103	290	16.9591	164	9.59064	124.1	31.5	2316	489.3	171.9	227.3	120.9	636.3	451.5	37.2105	26.4035	111.2	38.3	3146	55.6	81.6	162.8	89	243.5	158	14.2398	9.23977	29.1	34	2667	28.9	70.4	156.4
66	1	2018-03-09	8		2.27	4.18	42	12	96	1.03	5.65	52.2	0.92619	38.9	27	155.4	29.6	15.2	0.888889	5.7	0.333333	37.4	37.9	4196	660.7	501	57.9	22.7	35.5	25.2	2.07602	1.47368	24	34.9	2113	232.2	360.7	57.6	34.3	16.7	8.6	0.976608	0.502924	4.1	39.9	3245	80.8	222.7	0.7
67	1	2018-03-14	8		4.19	1.92	70	29.7	27	2.54	6.01	41.1	1.00857	70.6	43.8	126.9	14	141.4	8.26901	68.5	4.00585	185.1	25.4	1750	646.8	413.6	44.7	53.9	136.2	75.6	7.96491	4.42105	177.2	33.9	3299	255.2	367.7	53.6	73.2	140	100	8.18713	5.84795	127.4	31.8	2932	115.3	242.1	63.3
62	1	2018-04-25	9		4.15	3.15	82	16.6	60	1.4	3.83	48.2	2.13293	174.9	36.1	233	284.2	168.1	9.83041	113.3	6.62573	157	29.6	2941	320.7	225.1	70.2	55	83.9	37.8	4.90643	2.21053	2.8	40.7	3486	92.1	174	63.3	69.9	43.4	23.9	2.53801	1.39766	1.8	35.7	2981	45.4	134.9	62.7
66	2	2018-07-06	4		7.6	2.66	152	16	61	1.36	5.83	61.7	0.394737	60	32	239.3	137.7	306.7	17.9357	204.7	11.9708	174	29.9	2355	1331.7	986.8	98	64.3	137.8	92.8	8.05848	5.4269	84.1	32.2	2197	787	501.1	71.2	52.7	83.3	48.7	4.87135	2.84795	6.5	36.6	1943	178.7	266.5	68.3
48	1	2016-03-03	32		6.38	4.06	90	13.6	75	1.16	4.16	55.1	0.903333	81.3	55.3	180.5	97.8	141.9	8.29825	70.9	4.1462	73.9	36.2	3196	739	302.1	57.9	39.5	109.4	51	6.39766	2.98246	34.7	37.8	1268	130.2	216.3	67.1	58.8	57.9	32.5	3.38596	1.90058	3.8	34.4	2744	53.2	161.8	62.7
[truncated: 63 more columns]
